# Supplementary material for: Identification of Plant-like Galactolipids in Chromera velia, a Photosynthetic Relative of Malaria Parasites
Source: PubMed Central journal article supplement — J Biol Chem. 2011 Jun 28;286(34):29893–903. doi: 10.1074/jbc.M111.254979 (PMC3191030; doi:10.1074/jbc.m111.254979), 2011-06-28
Supplement: supp_M111.254979_jbc.M111.254979-1.pdf [file supp_M111.254979_jbc.M111.254979-1.pdf]

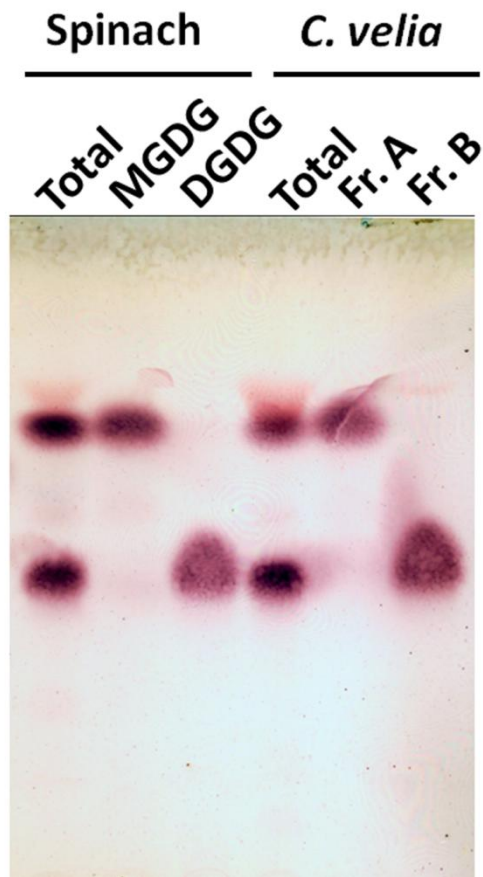

**Figure S1: *Chromera velia* MGDG-like and DGDG-like lipid contain a galactosyl polar head.**

Total lipid extracts, fraction A and fraction B (extracted from HPTLC plates) from *C. velia* were subjected to mild alkaline hydrolysis. The polar heads subsequently released were analyzed by HPTLC migration followed by orcinol and sulfuric acid exposure.
