# Supplementary material for: Identification of Plant-like Galactolipids in Chromera velia, a Photosynthetic Relative of Malaria Parasites
Source: PubMed Central journal article supplement — J Biol Chem. 2011 Jun 28;286(34):29893–903. doi: 10.1074/jbc.M111.254979 (PMC3191030; doi:10.1074/jbc.m111.254979), 2011-06-28
Supplement: supp_M111.254979_jbc.M111.254979-2.pdf [file supp_M111.254979_jbc.M111.254979-2.pdf]

Figure S2

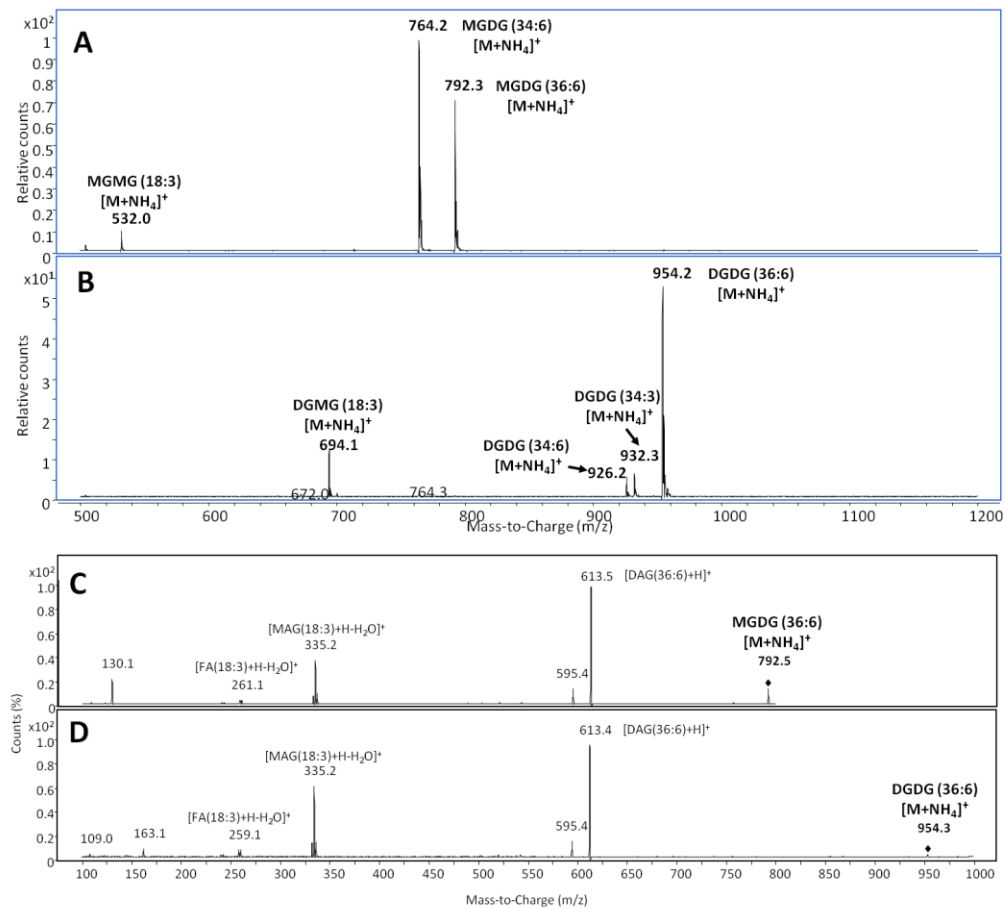

**Figure S2: LC-MS/MS analysis of spinach galactolipids.**

(A) MGDG species were scanned by neutral loss of an ammonium adducted dehydrated monohexose from MGDG (m/z=179) and (B) DGDG species were scanned by neutral loss of an ammonium adducted dehydrated dihexose from DGDG (m/z=341) in positive mode. MSMS fragmentation analysis revealed the structure of MGDG (36:6) molecular specie (C) and DGDG (36:6) molecular specie detected by neutral loss scanning (D).
