# Supplementary material for: Identification of Plant-like Galactolipids in Chromera velia, a Photosynthetic Relative of Malaria Parasites
Source: PubMed Central journal article supplement — J Biol Chem. 2011 Jun 28;286(34):29893–903. doi: 10.1074/jbc.M111.254979 (PMC3191030; doi:10.1074/jbc.m111.254979), 2011-06-28
Supplement: supp_M111.254979_jbc.M111.254979-3.pdf [file supp_M111.254979_jbc.M111.254979-3.pdf]

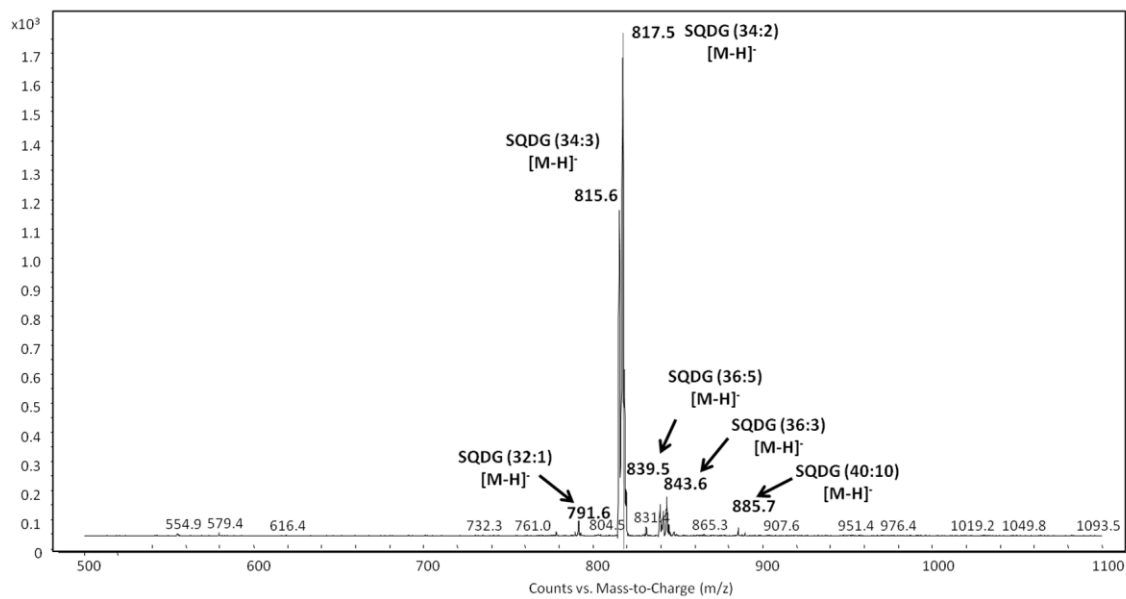

**Figure S3: Precursor ions scan for SQDG in *C. velia***

SQDG species were scanned by precursor ion scan for m/z 225. SQDG annotated are indicated.
